# Supplementary material for: Exploring the non-monotonic DNA capture behavior in a charged graphene nanopore
Source: Royal Society of Chemistry journal article supplement (doi:10.1039/d3cp03767c), 2023-01-01
Supplement: d3cp03767c1.pdf [file d3cp03767c1.pdf]

Supporting information for  
Exploring the non-monotonic DNA capture behavior in a charged  
graphene nanopore

You-Sheng Yu,<sup>a,b</sup> Qiang Ren,<sup>a</sup> Rong-Ri Tan,<sup>c\*</sup> and Hong-Ming Ding<sup>d\*</sup>

<sup>a</sup> School of Science, East China University of Technology,  
Nanchang 330013, China.

<sup>b</sup> National Lab of Solid State Microstructures, Nanjing University,  
Nanjing 210093, China.

<sup>c</sup> Department of Physics, Jiangxi Science & Technology Normal University,  
Nanchang 330013, China.

E-mail: rogertanr@hotmail.com

<sup>d</sup> Center for Soft Condensed Matter Physics and Interdisciplinary Research,  
Soochow University, Suzhou 215006, China.

E-mail: dinghm@suda.edu.cn

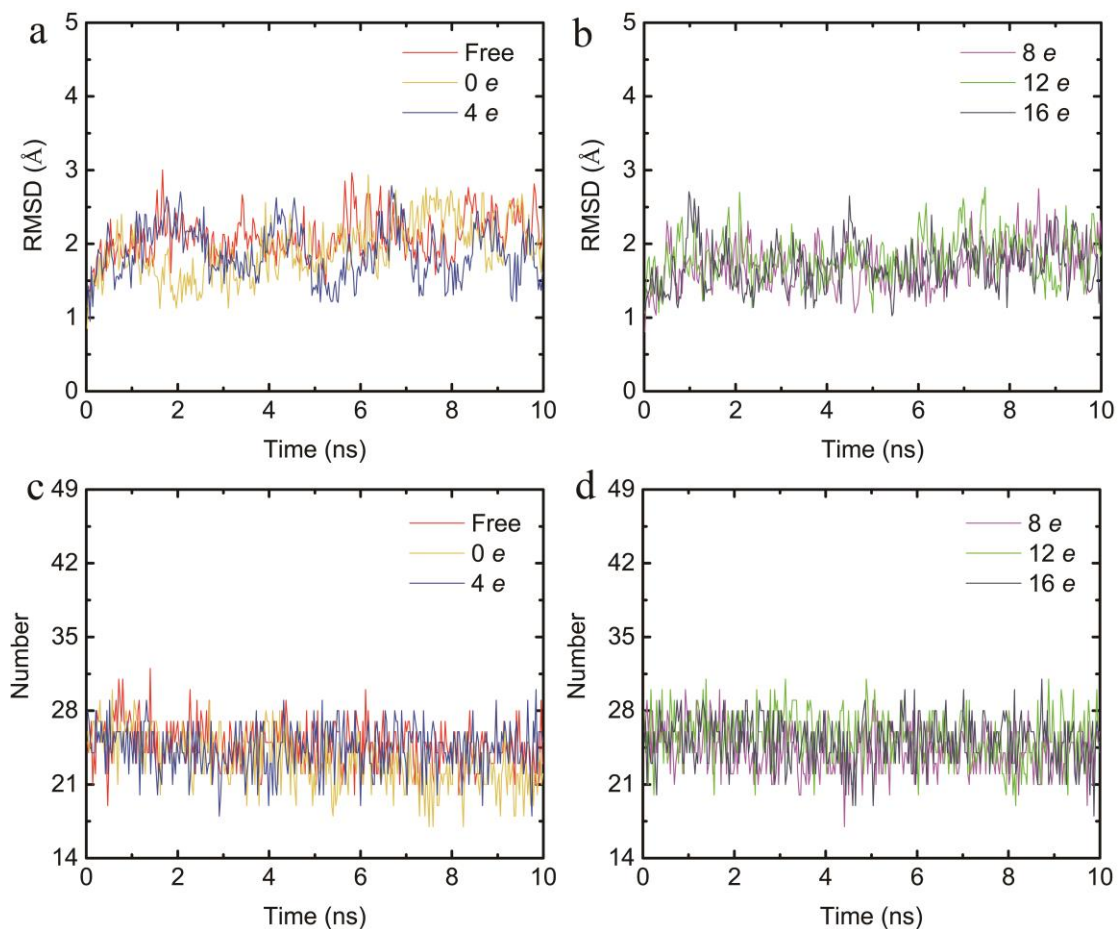

**Fig. S1.** The RMSD (a, b) and the number of hydrogen bonds (c, d) between two stands of DNA as functions of time in the simulations.

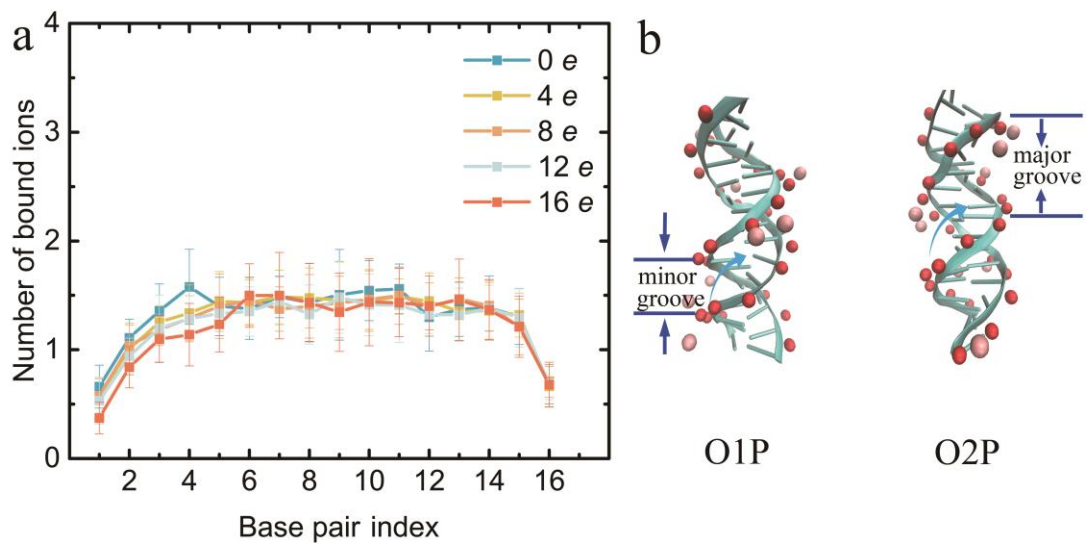

**Fig. S2.** (a) The number of  $K^+$  ions binding to each base pair. (b) Typical snapshots illustrating the binding of  $K^+$  ions to O1P and O2P atoms, where the red vdW sphere is the oxygen atom in the phosphate group and the pink one is  $K^+$  ion.
